# Supplementary material
Source: MDPI journal article supplement (https://www.mdpi.com/2071-1050/13/21/11876)
Supplement: s1 [file s1]

## Annex 1. Detailed Policy Gap

| Country | Code | Programmes                                                                      | Goals                                                                                                                                                                                                                                                                                                                                                                                                                                                                                                                           | Challenges                                                |                                                                                 |                                                                                       |                                                           |                                                                            |                                                                            |                                                                                  |                                                                         |                                            |
|---------|------|---------------------------------------------------------------------------------|---------------------------------------------------------------------------------------------------------------------------------------------------------------------------------------------------------------------------------------------------------------------------------------------------------------------------------------------------------------------------------------------------------------------------------------------------------------------------------------------------------------------------------|-----------------------------------------------------------|---------------------------------------------------------------------------------|---------------------------------------------------------------------------------------|-----------------------------------------------------------|----------------------------------------------------------------------------|----------------------------------------------------------------------------|----------------------------------------------------------------------------------|-------------------------------------------------------------------------|--------------------------------------------|
|         |      |                                                                                 |                                                                                                                                                                                                                                                                                                                                                                                                                                                                                                                                 | Stricter fire safety regulations than for other materials | Lack of promotion from the local governments on their tenures for new buildings | Discriminatory practices of insurance companies, additional fees for timber buildings | Insufficient knowledge on carbon accounting methodologies | Lack of appropriate tools to implement timber construction projects in BIM | High price variability due to the size and market share of the wood sector | Educational offer gap contributing to the lack of experts available in the field | Lack of knowledge for the assessment of operation and maintenance costs | Skepticism regarding material's durability |
| FINLAND | FP1  | National Wood Construction Programme                                            | Develop of large construction projects with timber while competitive<br>Increase the market share of multi-storey wooden buildings is 10%<br>Increase the forest industry exports to EUR 13 billion a year with a turnover of new products increases by EUR 1 billion a year<br>The use of domestic wood totals 65 - 70 million cubic metres a year<br>Increase the use of wood in the built environment                                                                                                                        |                                                           | X                                                                               |                                                                                       |                                                           | X                                                                          | X                                                                          |                                                                                  | X                                                                       |                                            |
|         | FP2  | The Wood Building Programme                                                     | Promote the use of timber in public buildings<br>Strengthen regional skills bases<br>Promotion of wood products exports                                                                                                                                                                                                                                                                                                                                                                                                         |                                                           | X                                                                               |                                                                                       |                                                           | X                                                                          | X                                                                          |                                                                                  |                                                                         |                                            |
| NORWAY  | NP1  | Wood Based Innovation Programme                                                 | Increase the use of wood in products (including buildings)<br>Increase the profitability in the woodworking industry<br>Increase the competitiveness of timber as a construction material                                                                                                                                                                                                                                                                                                                                       |                                                           |                                                                                 |                                                                                       |                                                           |                                                                            | X                                                                          |                                                                                  |                                                                         |                                            |
|         | NP2  | SKOG22 - National strategy for the forest and wood industry                     | Increase competence and pace of innovation in the timber industry<br>Develop requirements for LCA in the Technical Regulations<br>Introduce climate and environmental requirements in the Plan and the Building Acts<br>Promote the restructuring in the industry to ensure sufficient competitiveness<br>Showcase the potential of timber construction<br>Promote the harmonizatio of fire safety regulations                                                                                                                  |                                                           | X                                                                               |                                                                                       | X                                                         |                                                                            | X                                                                          |                                                                                  | X                                                                       |                                            |
|         | NP3  | Bio-economy scheme                                                              | Promote innovation on the wood sector<br>Develop regional and local networks for communication and knowledge tranfer<br>Promotion of timber based pilot projects<br>Support the development of methods to conduct LCA & EPDs<br>Support the production and deliveries of timber based on Norwegian Wood                                                                                                                                                                                                                         | X                                                         | X                                                                               |                                                                                       | X                                                         |                                                                            | X                                                                          | X                                                                                | X                                                                       |                                            |
|         |      |                                                                                 |                                                                                                                                                                                                                                                                                                                                                                                                                                                                                                                                 |                                                           |                                                                                 |                                                                                       |                                                           |                                                                            |                                                                            |                                                                                  |                                                                         |                                            |
| SWEEDEN | SP1  | Industry Research Programme for the forest and wood industry                    | Promote research & development in the wood sector<br>Promote Swedish engagement in the EU frameworks<br><br>Harmonize EU building regulations, especially with regard to fire safety                                                                                                                                                                                                                                                                                                                                            |                                                           |                                                                                 |                                                                                       |                                                           |                                                                            | X                                                                          |                                                                                  |                                                                         |                                            |
|         | SP2  | The National Strategic Research Agenda for the Forest-Based Industries NRA 2020 | Eliminate discriminatory practices or regualtions with regard to the use of timber<br>Show case systems for tall timber buildings (over 20 floors)<br>Promote the development of fast, moisture-proof and material-efficient construction processes<br>Develop strategies for monitoring of moisture safety and energy efficiency in timber buildings<br><br>Promote the environmental benefits related to the use of timber in the built environment<br>Show case the possibilities of timber in terms of architectonic design | X                                                         |                                                                                 | X                                                                                     | X                                                         | X                                                                          | X                                                                          |                                                                                  |                                                                         |                                            |
|         |      |                                                                                 |                                                                                                                                                                                                                                                                                                                                                                                                                                                                                                                                 |                                                           |                                                                                 |                                                                                       |                                                           |                                                                            |                                                                            |                                                                                  |                                                                         |                                            |
|         | SP3  | BioInnovation programme                                                         | create the conditions for increasing the use of bio-based products in the construction sector<br>increase the competitiveness of the Swedish wood manufacturing industry<br>increase the demand for Swedish wood within three years, with a focus on the pine<br><br>promote innovative processes to increase the performance of pine based products<br>promote the development of industrialized pine products<br>Promote the development of industrialized timber construction products                                       |                                                           |                                                                                 | X                                                                                     |                                                           |                                                                            | X                                                                          |                                                                                  |                                                                         |                                            |
|         |      |                                                                                 |                                                                                                                                                                                                                                                                                                                                                                                                                                                                                                                                 |                                                           |                                                                                 |                                                                                       |                                                           |                                                                            |                                                                            |                                                                                  |                                                                         |                                            |
|         | SP4  | National Forest Program (NFP)                                                   | increas the knowledge on timber construction in municipalities and real estate industry<br>Show case best practices of timber buildings<br>stimulate innovation within the wood sector<br>support the development of innovative timber based constructive systems<br>support the development of the Nordic timber construction industry<br>increase the expor of timber based products<br>support the development of innovative sustainable housing solutions                                                                   |                                                           | X                                                                               |                                                                                       |                                                           |                                                                            | X                                                                          |                                                                                  | X                                                                       |                                            |
